# Supplementary material for: Ectopic insert-dependent neuronal expression of GFAP promoter-driven AAV constructs in adult mouse retina
Source: Front Cell Dev Biol. 2022 Sep 19;10:914386. doi: 10.3389/fcell.2022.914386 (PMC9527291; doi:10.3389/fcell.2022.914386)
Supplement: Supplementary file 2 [file Table1.XLSX]

## Sheet: D21 Efficiency
R=Retina, S=section
GFAP-mCherry	GFP + mCherry	GFP	Percentage				GFAP-Insm1-mCherry	GFP + mCherry	GFP	Percentage
Animal #1							Animal #1
R1_S1	38	42	90.4762	91.0362			R1_S1	4	71	5.6338	4.56611
R1_S2	55	58	94.8276				R1_S2	5	62	8.06452
R1_S3	36	41	87.8049				R1_S3	0	53	0
R2_S1	54	62	87.0968	87.1243			R2_S1	4	43	9.30233	5.80348
R2_S2	34	39	87.1795				R2_S2	3	37	8.10811
R2_S3	27	31	87.0968				R2_S3	0	52	0
Animal #2							Animal #2
R1_S1	54	54	100	96.9199			R1_S1	3	72	4.16667	8.72712
R1_S2	51	52	98.0769				R1_S2	3	46	6.52174
R1_S3	38	41	92.6829				R1_S3	11	71	15.493
R2_S1	46	49	93.8776	95.2028			R2_S1	1	55	1.81818	3.92774
R2_S2	39	40	97.5				R2_S2	3	39	7.69231
R2_S3	49	52	94.2308				R2_S3	1	44	2.27273
Animal #3							Animal #3
R1_S1	54	55	98.1818	94.7962			R1_S1	4	68	5.88235	5.97439
R1_S2	52	58	89.6552				R1_S2	1	49	2.04082
R1_S3	56	58	96.5517				R1_S3	5	50	10
R2_S1	50	55	90.9091	88.1352			R2_S1	2	50	4	6.60924
R2_S2	42	52	80.7692				R2_S2	3	41	7.31707
R2_S3	51	55	92.7273				R2_S3	4	47	8.51064
GFAP-Oct4-mCherry	GFP + mCherry	GFP	Percentage				GFAP-Nrl-mCherry	GFP + mCherry	GFP	Percentage
Animal #1							Animal #1
R1_S1	45	48	93.75	87.6653			R1_S1	40	49	81.6327	72.8813
R1_S2	48	54	88.8889				R1_S2	39	61	63.9344
R1_S3	45	56	80.3571				R1_S3	38	52	73.0769
R2_S1	63	65	96.9231	95.5059			R2_S1	47	54	87.037	81.9004
R2_S2	55	57	96.4912				R2_S2	39	55	70.9091
R2_S3	54	58	93.1034				R2_S3	43	49	87.7551
Animal #2							Animal #2
R1_S1	64	67	95.5224	80.6503			R1_S1	66	69	95.6522	85.0755
R1_S2	42	56	75				R1_S2	40	47	85.1064
R1_S3	35	49	71.4286				R1_S3	35	47	74.4681
R2_S1	62	64	96.875	96.0614			R2_S1	39	57	68.4211	69.1114
R2_S2	64	66	96.9697				R2_S2	39	60	65
R2_S3	50	53	94.3396				R2_S3	34	46	73.913
Animal #3							Animal #3
R1_S1	59	68	86.7647	91.0762			R1_S1	67	74	90.5405	79.9317
R1_S2	41	46	89.1304				R1_S2	30	43	69.7674
R1_S3	73	75	97.3333				R1_S3	31	39	79.4872
R2_S1	43	56	76.7857	82.865			R2_S1	43	55	78.1818	74.6717
R2_S2	36	46	78.2609				R2_S2	32	48	66.6667
R2_S3	58	62	93.5484				R2_S3	38	48	79.1667
GFAP-NeuroD1-mCherry	GFP + mCherry	GFP	Percentage				GFAP-Atoh7-Ascl1-mCherry	GFP + mCherry	GFP	Percentage
Animal #1							Animal #1
R1_S1	4	64	6.25	19.8821			R1_S1	8	55	14.5455	11.6963
R1_S2	23	53	43.3962				R1_S2	7	58	12.069
R1_S3	5	50	10				R1_S3	5	59	8.47458
R2_S1	3	78	3.84615	9.06341			R2_S1	8	42	19.0476	22.0757
R2_S2	8	49	16.3265				R2_S2	9	65	13.8462
R2_S3	4	57	7.01754				R2_S3	17	51	33.3333
Animal #2							Animal #2
R1_S1	3	92	3.26087	13.18			R1_S1	10	52	19.2308	10.0578
R1_S2	9	45	20				R1_S2	5	55	9.09091
R1_S3	7	43	16.2791				R1_S3	1	54	1.85185
R2_S1	3	69	4.34783	10.8432			R2_S1	7	48	14.5833	12.4518
R2_S2	8	44	18.1818				R2_S2	5	57	8.77193
R2_S3	5	50	10				R2_S3	7	50	14
Animal #3							Animal #3
R1_S1	10	51	19.6078	12.4136			R1_S1	6	54	11.1111	6.43594
R1_S2	3	46	6.52174				R1_S2	3	61	4.91803
R1_S3	6	54	11.1111				R1_S3	2	61	3.27869
R2_S1	5	45	11.1111	17.045			R2_S1	2	61	3.27869	6.06909
R2_S2	7	52	13.4615				R2_S2	5	56	8.92857
R2_S3	17	64	26.5625				R2_S3	3	50	6
GFAP-Mybl1-mCherry	GFP + mCherry	GFP	Percentage				GFAP-Atoh7-Brn3b-mCherry	GFP + mCherry	GFP	Percentage
Animal #1							Animal #1
R1_S1	3	36	8.33333	6.83007			R1_S1	12	58	20.6897	9.34893
R1_S2	1	30	3.33333				R1_S2	1	50	2
R1_S3	3	34	8.82353				R1_S3	3	56	5.35714
R2_S1	1	47	2.12766	17.0287			R2_S1	9	72	12.5	7.30994
R2_S2	5	32	15.625				R2_S2	2	48	4.16667
R2_S3	8	24	33.3333				R2_S3	3	57	5.26316
Animal #2							Animal #2
R1_S1	3	37	8.10811	11.1419			R1_S1	4	60	6.66667	14.2677
R1_S2	2	29	6.89655				R1_S2	13	55	23.6364
R1_S3	7	38	18.4211				R1_S3	7	56	12.5
R2_S1	3	46	6.52174	13.3644			R2_S1	16	50	32	33.5833
R2_S2	3	28	10.7143				R2_S2	17	51	33.3333
R2_S3	8	35	22.8571				R2_S3	17	48	35.4167
Animal #3							Animal #3
R1_S1	3	76	3.94737	6.83767			R1_S1	11	48	22.9167	16.6052
R1_S2	7	63	11.1111				R1_S2	6	35	17.1429
R1_S3	3	55	5.45455				R1_S3	4	41	9.7561
R2_S1	2	61	3.27869	4.2895			R2_S1	15	51	29.4118	28.2038
R2_S2	1	44	2.27273				R2_S2	12	53	22.6415
R2_S3	3	41	7.31707				R2_S3	14	43	32.5581

## Sheet: D21 Specificity
R=Retina, S=section
GFAP-mCherry	GFP + mCherry	mCherry	Percentage	Average			GFAP-Insm1-mCherry	GFP + mCherry	mCherry	Percentage	Average
Animal #1							Animal #1
R1_S1	38	45	84.4444	88.7037			R1_S1	4	37	10.8108	7.57186
R1_S2	55	60	91.6667				R1_S2	5	42	11.9048
R1_S3	36	40	90				R1_S3	0	28	0
R2_S1	54	64	84.375	86.8792			R2_S1	4	42	9.52381	6.11578
R2_S2	34	36	94.4444				R2_S2	3	34	8.82353
R2_S3	27	33	81.8182				R2_S3	0	24	0
Animal #2							Animal #2
R1_S1	54	59	91.5254	90.2054			R1_S1	3	40	7.5	10.0191
R1_S2	51	55	92.7273				R1_S2	3	39	7.69231
R1_S3	38	44	86.3636				R1_S3	11	74	14.8649
R2_S1	46	49	93.8776	89.2334			R2_S1	1	33	3.0303	4.80598
R2_S2	39	49	79.5918				R2_S2	3	34	8.82353
R2_S3	49	52	94.2308				R2_S3	1	39	2.5641
Animal #3							Animal #3
R1_S1	54	54	100	97.5309			R1_S1	4	46	8.69565	6.79798
R1_S2	50	54	92.5926				R1_S2	1	41	2.43902
R1_S3	56	56	100				R1_S3	5	54	9.25926
R2_S1	50	51	98.0392	97.9302			R2_S1	2	54	3.7037	5.79806
R2_S2	42	43	97.6744				R2_S2	3	56	5.35714
R2_S3	51	52	98.0769				R2_S3	4	48	8.33333
GFAP-Oct4-mCherry	GFP + mCherry	mCherry	Percentage	Average			GFAP-Nrl-mCherry	GFP + mCherry	mCherry	Percentage	Average
Animal #1							Animal #1
R1_S1	45	54	83.3333	81.8861			R1_S1	40	45	88.8889	90.7407
R1_S2	48	62	77.4194				R1_S2	39	42	92.8571
R1_S3	45	53	84.9057				R1_S3	38	42	90.4762
R2_S1	63	71	88.7324	85.089			R2_S1	47	52	90.3846	89.5135
R2_S2	55	64	85.9375				R2_S2	39	45	86.6667
R2_S3	54	67	80.597				R2_S3	43	47	91.4894
Animal #2							Animal #2
R1_S1	64	72	88.8889	87.963			R1_S1	66	75	88	90.0262
R1_S2	42	48	87.5				R1_S2	40	46	86.9565
R1_S3	35	40	87.5				R1_S3	39	41	95.122
R2_S1	62	72	86.1111	88.8047			R2_S1	39	43	90.6977	87.6257
R2_S2	64	66	96.9697				R2_S2	34	39	87.1795
R2_S3	50	60	83.3333				R2_S3	34	40	85
Animal #3							Animal #3
R1_S1	59	65	90.7692	87.6309			R1_S1	67	72	93.0556	89.2495
R1_S2	41	50	82				R1_S2	30	33	90.9091
R1_S3	73	81	90.1235				R1_S3	31	37	83.7838
R2_S1	43	49	87.7551	86.4463			R2_S1	43	45	95.5556	90.0808
R2_S2	28	34	82.3529				R2_S2	32	38	84.2105
R2_S3	58	65	89.2308				R2_S3	38	42	90.4762
GFAP-NeuroD1-mCherry	GFP + mCherry	mCherry	Percentage	Average			GFAP-Atoh7-Ascl1-mCherry	GFP + mCherry	mCherry	Percentage	Average
Animal #1							Animal #1
R1_S1	4	26	15.3846	19.2023			R1_S1	8	70	11.4286	12.2972
R1_S2	23	90	25.5556				R1_S2	7	54	12.963
R1_S3	5	30	16.6667				R1_S3	5	40	12.5
R2_S1	3	29	10.3448	12.6308			R2_S1	8	71	11.2676	17.8137
R2_S2	8	47	17.0213				R2_S2	9	61	14.7541
R2_S3	4	38	10.5263				R2_S3	17	62	27.4194
Animal #2							Animal #2
R1_S1	3	51	5.88235	13.0475			R1_S1	10	83	12.0482	7.5699
R1_S2	9	53	16.9811				R1_S2	5	58	8.62069
R1_S3	7	43	16.2791				R1_S3	1	49	2.04082
R2_S1	3	49	6.12245	11.5025			R2_S1	7	51	13.7255	11.8654
R2_S2	8	47	17.0213				R2_S2	5	49	10.2041
R2_S3	5	44	11.3636				R2_S3	7	60	11.6667
Animal #3							Animal #3
R1_S1	10	56	17.8571	12.8002			R1_S1	6	63	9.52381	6.28763
R1_S2	3	40	7.5				R1_S2	3	58	5.17241
R1_S3	6	46	13.0435				R1_S3	2	48	4.16667
R2_S1	5	29	17.2414	18.0646			R2_S1	2	49	4.08163	6.15492
R2_S2	7	49	14.2857				R2_S2	5	56	8.92857
R2_S3	17	75	22.6667				R2_S3	3	55	5.45455
GFAP-Mybl1-mCherry	GFP + mCherry	mCherry	Percentage	Average			GFAP-Atoh7-Brn3b-mCherry	GFP + mCherry	mCherry	Percentage	Average
Animal #1							Animal #1
R1_S1	3	38	7.89474	6.44539			R1_S1	12	59	20.339	10.0567
R1_S2	1	30	3.33333				R1_S2	1	29	3.44828
R1_S3	3	37	8.10811				R1_S3	3	47	6.38298
R2_S1	1	19	5.26316	10.2639			R2_S1	9	50	18	9.77459
R2_S2	5	41	12.1951				R2_S2	2	33	6.06061
R2_S3	8	60	13.3333				R2_S3	3	57	5.26316
Animal #2							Animal #2
R1_S1	3	56	5.35714	8.96646			R1_S1	4	53	7.54717	13.2087
R1_S2	2	38	5.26316				R1_S2	13	62	20.9677
R1_S3	7	43	16.2791				R1_S3	7	63	11.1111
R2_S1	3	52	5.76923	9.33548			R2_S1	16	79	20.2532	23.8823
R2_S2	3	42	7.14286				R2_S2	17	53	32.0755
R2_S3	8	53	15.0943				R2_S3	17	88	19.3182
Animal #3							Animal #3	11	45	24.4444	14.7123
R1_S1	3	52	5.76923	8.91862			R1_S1	6	50	12
R1_S2	7	46	15.2174				R1_S2	4	52	7.69231
R1_S3	3	52	5.76923				R1_S3
								15	70	21.4286	22.4515
R2_S1	2	75	2.66667	3.65338			R2_S1	12	60	20
R2_S2	1	33	3.0303				R2_S2	14	54	25.9259
R2_S3	3	57	5.26316				R2_S3

## Sheet: D21 Tfap2a
R=Retina, S=section
GFAP-mCherry	Tfap2a + mCherry	mCherry	Percentage				GFAP-Insm1-mCherry	Tfap2a + mCherry	mCherry	Percentage
Animal #1							Animal #1
R1_S1	0	40	0				R1_S1	10	28	35.7143
R2_S1	0	33	0				R2_S1	9	24	37.5
Animal #2							Animal #2
R1_S1	0	44	0				R1_S1	20	67	29.8507
R2_S1	0	52	0				R2_S1	17	39	43.5897
Animal #3							Animal #3
R1_S1	0	56	0				R1_S1	11	54	20.3704
R2_S1	0	52	0				R2_S1	11	48	22.9167
GFAP-Oct4-mCherry	Tfap2a + mCherry	mCherry	Percentage				GFAP-Nrl-mCherry	Tfap2a + mCherry	mCherry	Percentage
Animal #1							Animal #1
R1_S1	4	53	7.54717				R1_S1	0	49	0
R2_S1	4	67	5.97015				R2_S1	0	47	0
Animal #2							Animal #2
R1_S1	4	40	10				R1_S1	0	43	0
R2_S1	7	60	11.6667				R2_S1	0	40	0
Animal #3							Animal #3
R1_S1	5	81	6.17284				R1_S1	0	39	0
R2_S1	4	65	6.15385				R2_S1	0	42	0
GFAP-NeuroD1-mCherry	Tfap2a + mCherry	mCherry	Percentage				GFAP-Atoh7-Ascl1-mCherry	Tfap2a + mCherry	mCherry	Percentage
Animal #1							Animal #1
R1_S1	9	24	37.5				R1_S1	4	40	10
R2_S1	6	38	15.7895				R2_S1	4	62	6.45161
Animal #2							Animal #2
R1_S1	21	43	48.8372				R1_S1	9	49	18.3673
R2_S1	21	44	47.7273				R2_S1	7	60	11.6667
Animal #3							Animal #3
R1_S1	12	46	26.087				R1_S1	5	48	10.4167
R2_S1	34	75	45.3333				R2_S1	6	55	10.9091
GFAP-Mybl1-mCherry	Tfap2a + mCherry	mCherry	Percentage				GFAP-Atoh7-Brn3b-mCherry	Tfap2a + mCherry	mCherry	Percentage
Animal #1							Animal #1
R1_S1	12	37	32.4324				R1_S1	2	47	4.25532
R2_S1	19	60	31.6667				R2_S1	5	57	8.77193
Animal #2							Animal #2
R1_S1	3	43	6.97674				R1_S1	5	63	7.93651
R2_S1	16	53	30.1887				R2_S1	6	88	6.81818
Animal #3							Animal #3
R1_S1	21	52	40.3846				R1_S1	3	52	5.76923
R2_S1	28	57	49.1228				R2_S1	3	54	5.55556

## Sheet: D21 Rbpms
R=Retina, S=section
GFAP-mCherry	Rbpms + mCherry	mCherry	Percentage				GFAP-Insm1-mCherry	Rbpms + mCherry	mCherry	Percentage
Animal #1							Animal #1
R1_S1	0	60	0				R1_S1	31	42	73.8095
R2_S1	0	36	0				R2_S1	27	34	79.4118
Animal #2							Animal #2
R1_S1	0	55	0				R1_S1	26	39	66.6667
R2_S1	0	49	0				R2_S1	20	34	58.8235
Animal #3							Animal #3
R1_S1	0	54	0				R1_S1	24	41	58.5366
R2_S1	0	43	0				R2_S1	33	56	58.9286
GFAP-Oct4-mCherry	Rbpms + mCherry	mCherry	Percentage				GFAP-Nrl-mCherry	Rbpms + mCherry	mCherry	Percentage
Animal #1							Animal #1
R1_S1	0	62	0				R1_S1	0	42	0
R2_S1	0	64	0				R2_S1	0	45	0
Animal #2							Animal #2
R1_S1	0	39	0				R1_S1	0	46	0
R2_S1	0	51	0				R2_S1	0	48	0
Animal #3	0	72	0				Animal #3
R1_S1	0	55	0				R1_S1	0	33	0
R2_S1							R2_S1	0	39	0
GFAP-NeuroD1-mCherry	Rbpms + mCherry	mCherry	Percentage				GFAP-Atoh7-Ascl1-mCherry	Rbpms + mCherry	mCherry	Percentage
Animal #1							Animal #1
R1_S1	37	61	60.6557				R1_S1	29	54	53.7037
R2_S1	30	47	63.8298				R2_S1	26	61	42.623
Animal #2							Animal #2
R1_S1	33	53	62.2642				R1_S1	28	58	48.2759
R2_S1	26	47	55.3191				R2_S1	22	49	44.898
Animal #3							Animal #3
R1_S1	25	40	62.5				R1_S1	27	58	46.5517
R2_S1	30	49	61.2245				R2_S1	26	56	46.4286
GFAP-Mybl1-mCherry	Rbpms + mCherry	mCherry	Percentage				GFAP-Atoh7-Brn3b-mCherry	Rbpms + mCherry	mCherry	Percentage
Animal #1							Animal #1
R1_S1	21	30	70				R1_S1	26	29	89.6552
R2_S1	29	41	70.7317				R2_S1	29	33	87.8788
Animal #2							Animal #2
R1_S1	19	38	50				R1_S1	26	62	41.9355
R2_S1	29	42	69.0476				R2_S1	21	53	39.6226
Animal #3							Animal #3
R1_S1	22	46	47.8261				R1_S1	21	50	42
R2_S1	24	33	72.7273				R2_S1	22	60	36.6667

## Sheet: D21 Otx2
R=Retina, S=section
GFAP-mCherry	Otx2 + mCherry	mCherry	Percentage				GFAP-Insm1-mCherry	Otx2 + mCherry	mCherry	Percentage
Animal #1							Animal #1
R1_S1	0	45	0				R1_S1	0	37	0
R2_S1	0	64	0				R2_S1	0	42	0
Animal #2							Animal #2
R1_S1	0	59	0				R1_S1	0	40	0
R2_S1	0	49	0				R2_S1	0	33	0
Animal #3							Animal #3
R1_S1	0	54	0				R1_S1	0	46	0
R2_S1	0	51	0				R2_S1	0	54	0
GFAP-Oct4-mCherry	Otx2 + mCherry	mCherry	Percentage				GFAP-Nrl-mCherry	Otx2 + mCherry	mCherry	Percentage
Animal #1							Animal #1
R1_S1	0	54	0				R1_S1	0	45	0
R2_S1	0	71	0				R2_S1	0	52	0
Animal #2							Animal #2
R1_S1	0	72	0				R1_S1	0	75	0
R2_S1	1	72	1.38889				R2_S1	0	43	0
Animal #3	0	65	0				Animal #3
R1_S1	0	49	0				R1_S1	0	72	0
R2_S1							R2_S1	0	45	0
GFAP-NeuroD1-mCherry	Otx2 + mCherry	mCherry	Percentage				GFAP-Atoh7-Ascl1-mCherry	Otx2 + mCherry	mCherry	Percentage
Animal #1							Animal #1
R1_S1	0	21	0				R1_S1	0	70	0
R2_S1	0	29	0				R2_S1	0	71	0
Animal #2							Animal #2
R1_S1	0	51	0				R1_S1	0	83	0
R2_S1	0	49	0				R2_S1	0	51	0
Animal #3							Animal #3
R1_S1	0	66	0				R1_S1	0	63	0
R2_S1	0	44	0				R2_S1	0	49	0
GFAP-Mybl1-mCherry	Otx2 + mCherry	mCherry	Percentage				GFAP-Atoh7-Brn3b-mCherry	Otx2 + mCherry	mCherry	Percentage
Animal #1							Animal #1
R1_S1	0	38	0				R1_S1	0	59	0
R2_S1	0	19	0				R2_S1	0	50	0
Animal #2							Animal #2
R1_S1	0	56	0				R1_S1	0	53	0
R2_S1	0	52	0				R2_S1	0	79	0
Animal #3							Animal #3
R1_S1	0	52	0				R1_S1	0	45	0
R2_S1	0	75	0				R2_S1	0	70	0

## Sheet: D8 Specificity
R= Retina, S= Section
GFAP-mCherry	GFP + mCherry	mCherry	Percentage	Average		GFAP-Atoh7-Ascl1-mCherry	GFP + mCherry	mCherry	Percentage	Average
Animal #1						Animal #1
R1_S1	36	45	80	75.9596		R1_S1	2	46	4.34783	2.78525
R1_S2	23	33	69.697			R1_S2	1	45	2.22222
R1_S3	43	55	78.1818			R1_S3	1	56	1.78571
R2_S1	38	48	79.1667	77.7013		R2_S1	1	31	3.22581	2.62566
R2_S2	35	41	85.3659			R2_S2	0	44	0
R2_S3	24	35	68.5714			R2_S3	2	43	4.65116
Animal #2						Animal #2
R1_S1	26	42	61.9048	55.9062		R1_S1	2	37	5.40541	1.8018
R1_S2	16	32	50			R1_S2	0	36	0
R1_S3	24	43	55.814			R1_S3	0	36	0
R2_S1	22	34	64.7059	56.6265		R2_S1	0	21	0	1.43854
R2_S2	22	41	53.6585			R2_S2	1	37	2.7027
R2_S3	17	33	51.5152			R2_S3	1	62	1.6129
											.
GFAP-Insm1-mCherry	GFP + mCherry	mCherry	Percentage	Average		GFAP-Atoh7-Ascl1-mCherry	GFP + mCherry	mCherry	Percentage	Average
Animal #1						Animal #1
R1_S1	0	21	0	0		R1_S1	0	27	0	0
R1_S2	0	31	0			R1_S2	0	39	0
R1_S3	0	20	0			R1_S3	0	34	0
R2_S1	0	16	0	1.14943		R2_S1	1	34	2.94118	2.0915
R2_S2	0	36	0			R2_S2	0	45	0
R2_S3	1	29	3.44828			R2_S3	2	60	3.33333
Animal #2						Animal #2
R1_S1	1	39	2.5641	2.33833		R1_S1	1	35	2.85714	0.952381
R1_S2	1	39	2.5641			R1_S2	0	17	0
R1_S3	1	53	1.88679			R1_S3	0	49	0
R2_S1	0	26	0	1.0101		R2_S1	0	36	0	0
R2_S2	0	30	0			R2_S2	0	36	0
R2_S3	1	33	3.0303			R2_S3	0	30	0

## Sheet: D8 Tfap2a
R= Retina, S= Section
GFAP-mCherry	Tfap2a + mCherry	mCherry	Percentage			GFAP-Atoh7-Ascl1-mCherry	Tfap2a + mCherry	mCherry	Percentage
Animal #1						Animal #1
R1_S1	0	44	0			R1_S1	8	56	14.2857
R2_S1	0	42	0			R2_S1	5	43	11.6279
Animal #2						Animal #2
R1_S1	0	48	0			R1_S1	5	36	13.8889
R2_S1	0	36	0			R2_S1	8	62	12.9032
GFAP-Insm1-mCherry	Tfap2a + mCherry	mCherry	Percentage			GFAP-Atoh7-Ascl1-mCherry	Tfap2a + mCherry	mCherry	Percentage
Animal #1						Animal #1
R1_S1	2	20	10			R1_S1	5	34	14.7059
R2_S1	5	29	17.2414			R2_S1	9	60	15
Animal #2						Animal #2
R1_S1	17	53	32.0755			R1_S1	6	36	16.6667
R2_S1	7	33	21.2121			R2_S1	5	30	16.6667

## Sheet: D8 Rbpms
R= Retina, S= Section
GFAP-mCherry	Rbpms + mCherry	mCherry	Percentage			GFAP-Atoh7-Ascl1-mCherry	Rbpms + mCherry	mCherry	Percentage
Animal #1						Animal #1
R1_S1	0	33	0			R1_S1	28	45	62.2222
R2_S1	0	41	0			R2_S1	27	44	61.3636
Animal #2						Animal #2
R1_S1	0	32	0			R1_S1	32	36	88.8889
R2_S1	0	41	0			R2_S1	33	37	89.1892
GFAP-Insm1-mCherry	Rbpms + mCherry	mCherry	Percentage			GFAP-Atoh7-Ascl1-mCherry	Rbpms + mCherry	mCherry	Percentage
Animal #1						Animal #1
R1_S1	28	31	90.3226			R1_S1	32	39	82.0513
R2_S1	32	36	88.8889			R2_S1	36	45	80
Animal #2						Animal #2
R1_S1	16	39	41.0256			R1_S1	47	49	95.9184
R2_S1	27	30	90			R2_S1	34	36	94.4444

## Sheet: D8 Otx2
R= Retina, S= Section
GFAP-mCherry	otx2 + mCherry	mCherry	Percentage			GFAP-Atoh7-Ascl1-mCherry	otx2 + mCherry	mCherry	Percentage
Animal #1						Animal #1
R1_S1	0	45	0			R1_S1	2	46	4.34783
R2_S1	0	48	0			R2_S1	0	31	0
Animal #2						Animal #2
R1_S1	0	42	0			R1_S1	0	24	0
R2_S1	0	34	0			R2_S1	0	21	0
GFAP-Insm1-mCherry	otx2 + mCherry	mCherry	Percentage			GFAP-Atoh7-Ascl1-mCherry	otx2 + mCherry	mCherry	Percentage
Animal #1						Animal #1
R1_S1	0	21	0			R1_S1	0	27	0
R2_S1	0	16	0			R2_S1	0	34	0
Animal #2						Animal #2
R1_S1	0	35	0			R1_S1	0	20	0
R2_S1	0	26	0			R2_S1	0	15	0

## Sheet: FLEX constructs
Efficiency						Specificity
R=Retina, S=section
Flex-mCherry	GFP + mCherry	mCherry	Percentage			Flex-mCherry	GFP + mCherry	mCherry	Percentage
Animal #1						Animal #1
R1_S1	25	29	86.2069			R1_S1	25	38	65.7895
R2_S1	15	24	62.5			R2_S1	15	25	60
Flex-Atoh7-Brn3b	GFP + mCherry	mCherry	Percentage			Flex-Atoh7-Brn3b	GFP + mCherry	mCherry	Percentage
Animal #1						Animal #1
R1_S1	51	56	91.0714			R1_S1	51	54	94.4444
R2_S1	39	46	84.7826			R2_S1	39	42	92.8571
